# Supplementary material for: Co-ordination behaviour of a novel bisthiourea tripodal ligand: structural, spectroscopic and electrochemical properties of a series of transition metal complexes
Source: Royal Society of Chemistry journal article supplement (doi:10.1039/c2dt11732k), 2012-01-01

# Supplementary Data

## $^1\text{H}$ NMR for $[\text{ZnL}^1]^{2+}$ in $\text{CD}_3\text{CN}$

Current Data Parameters  
NAME FS-1  
EXPNO 13  
PROCNO 1  
F2 - Acquisition Parameters  
Date\_ 20080408  
Time 16.25  
INSTRUM dpx400  
PROBHD 5 mm Dual 13  
SOLVENT CD3CN  
NS 16  
AQ 0.6832628 sec  
TE 0.0 K  
D1 1.00000000 sec  
MCREST 0.00000000 sec  
MCWRK 0.01500000 sec

----- CHANNEL f1 -----

8-04-08

Field 400 MHz

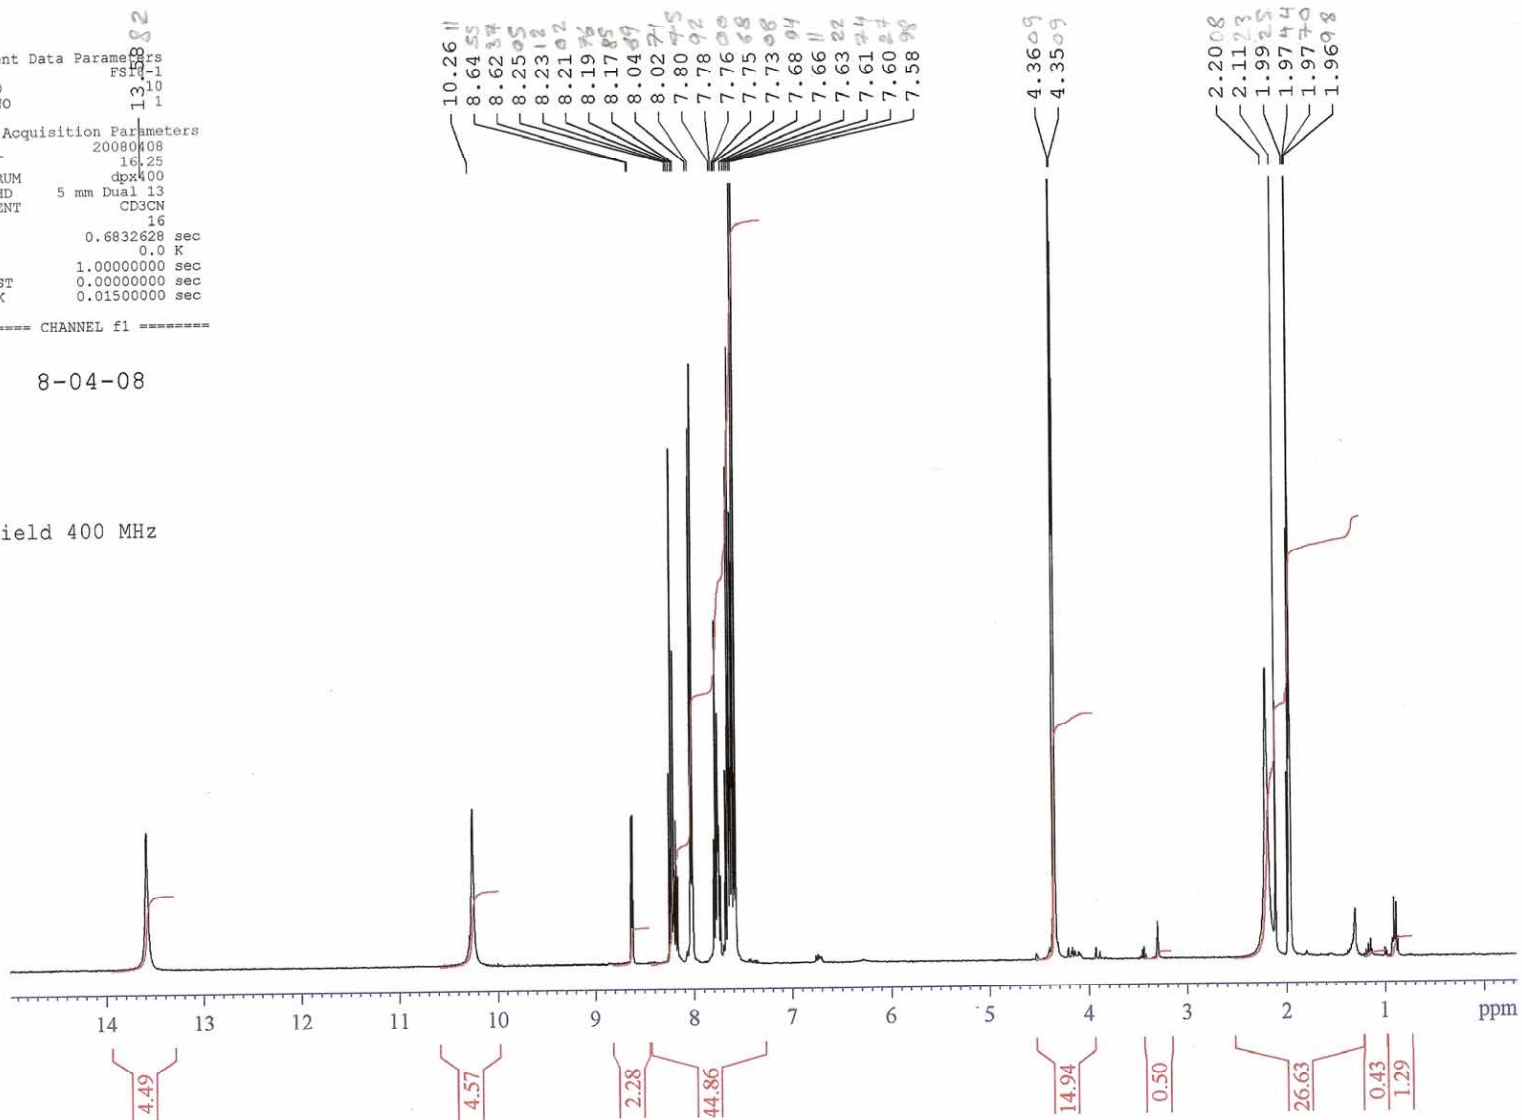

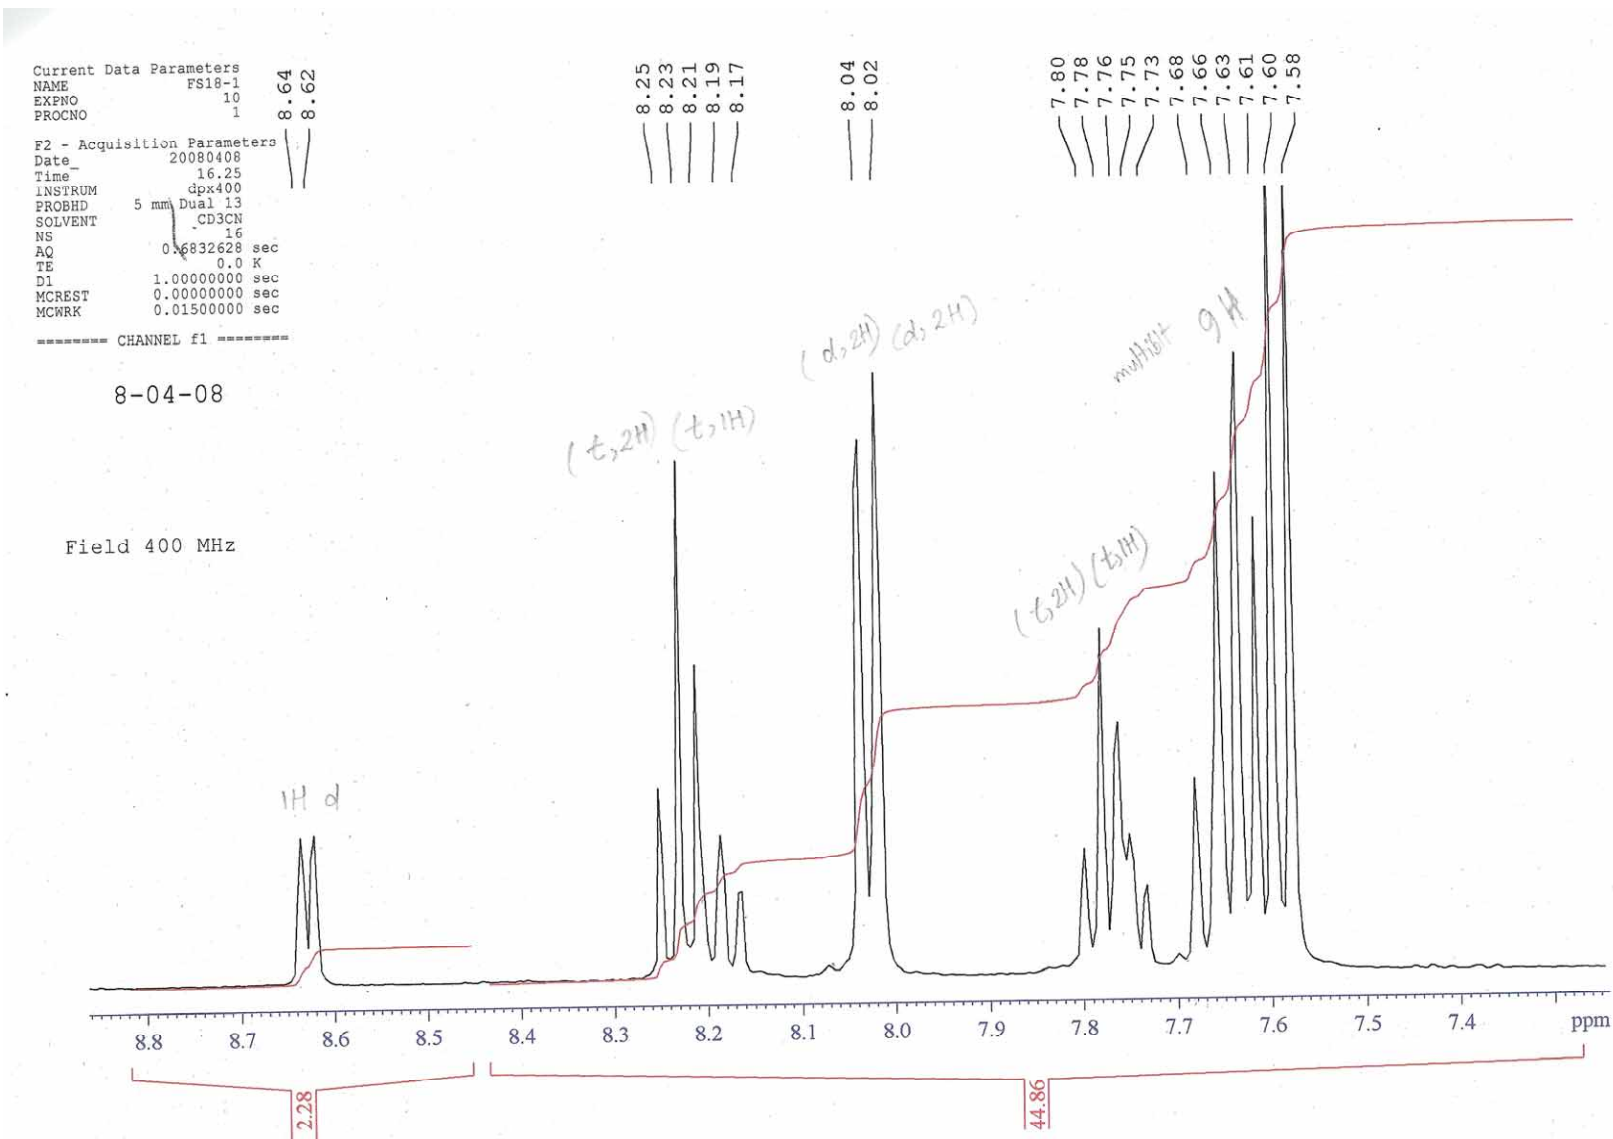

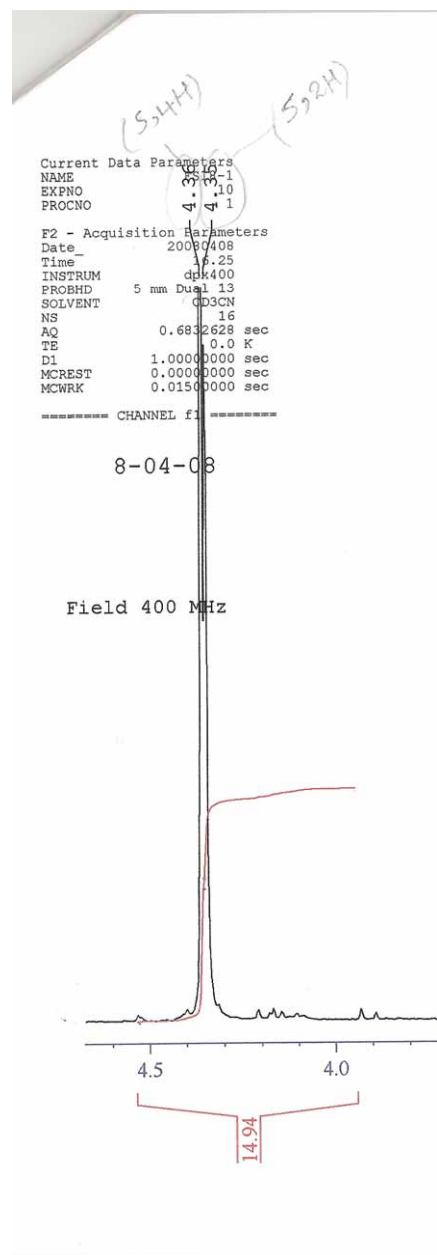

$^1\text{H NMR}$  for  $[\text{CdL}^1]^{2+}$  in  $\text{CD}_3\text{CN}$

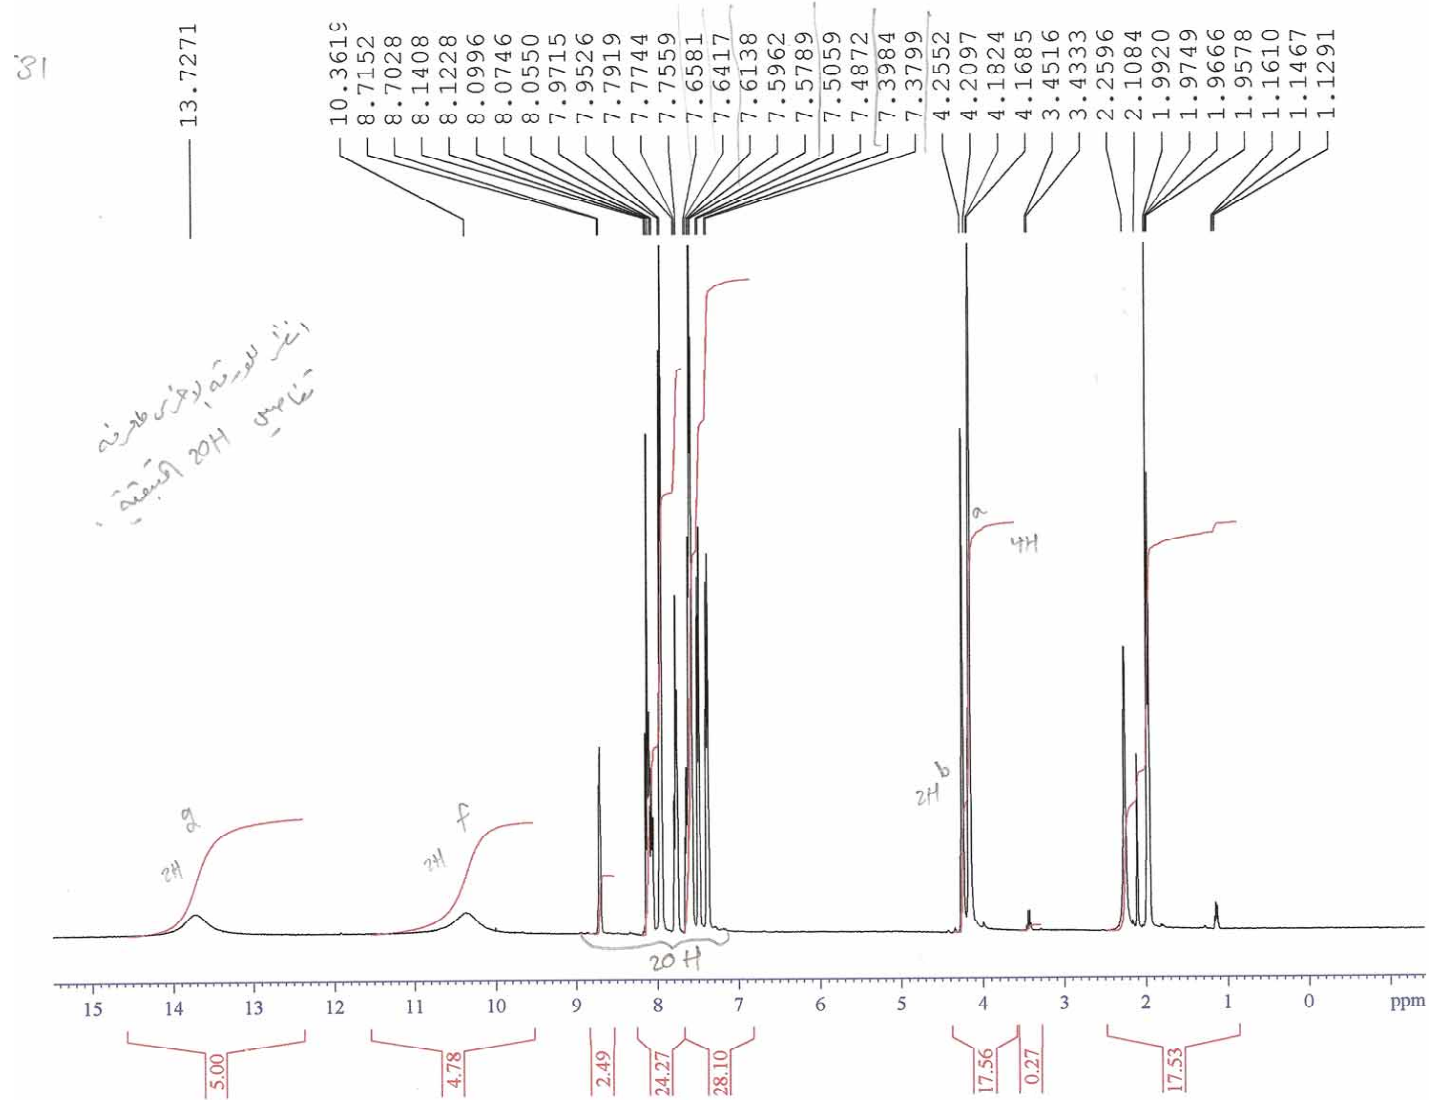

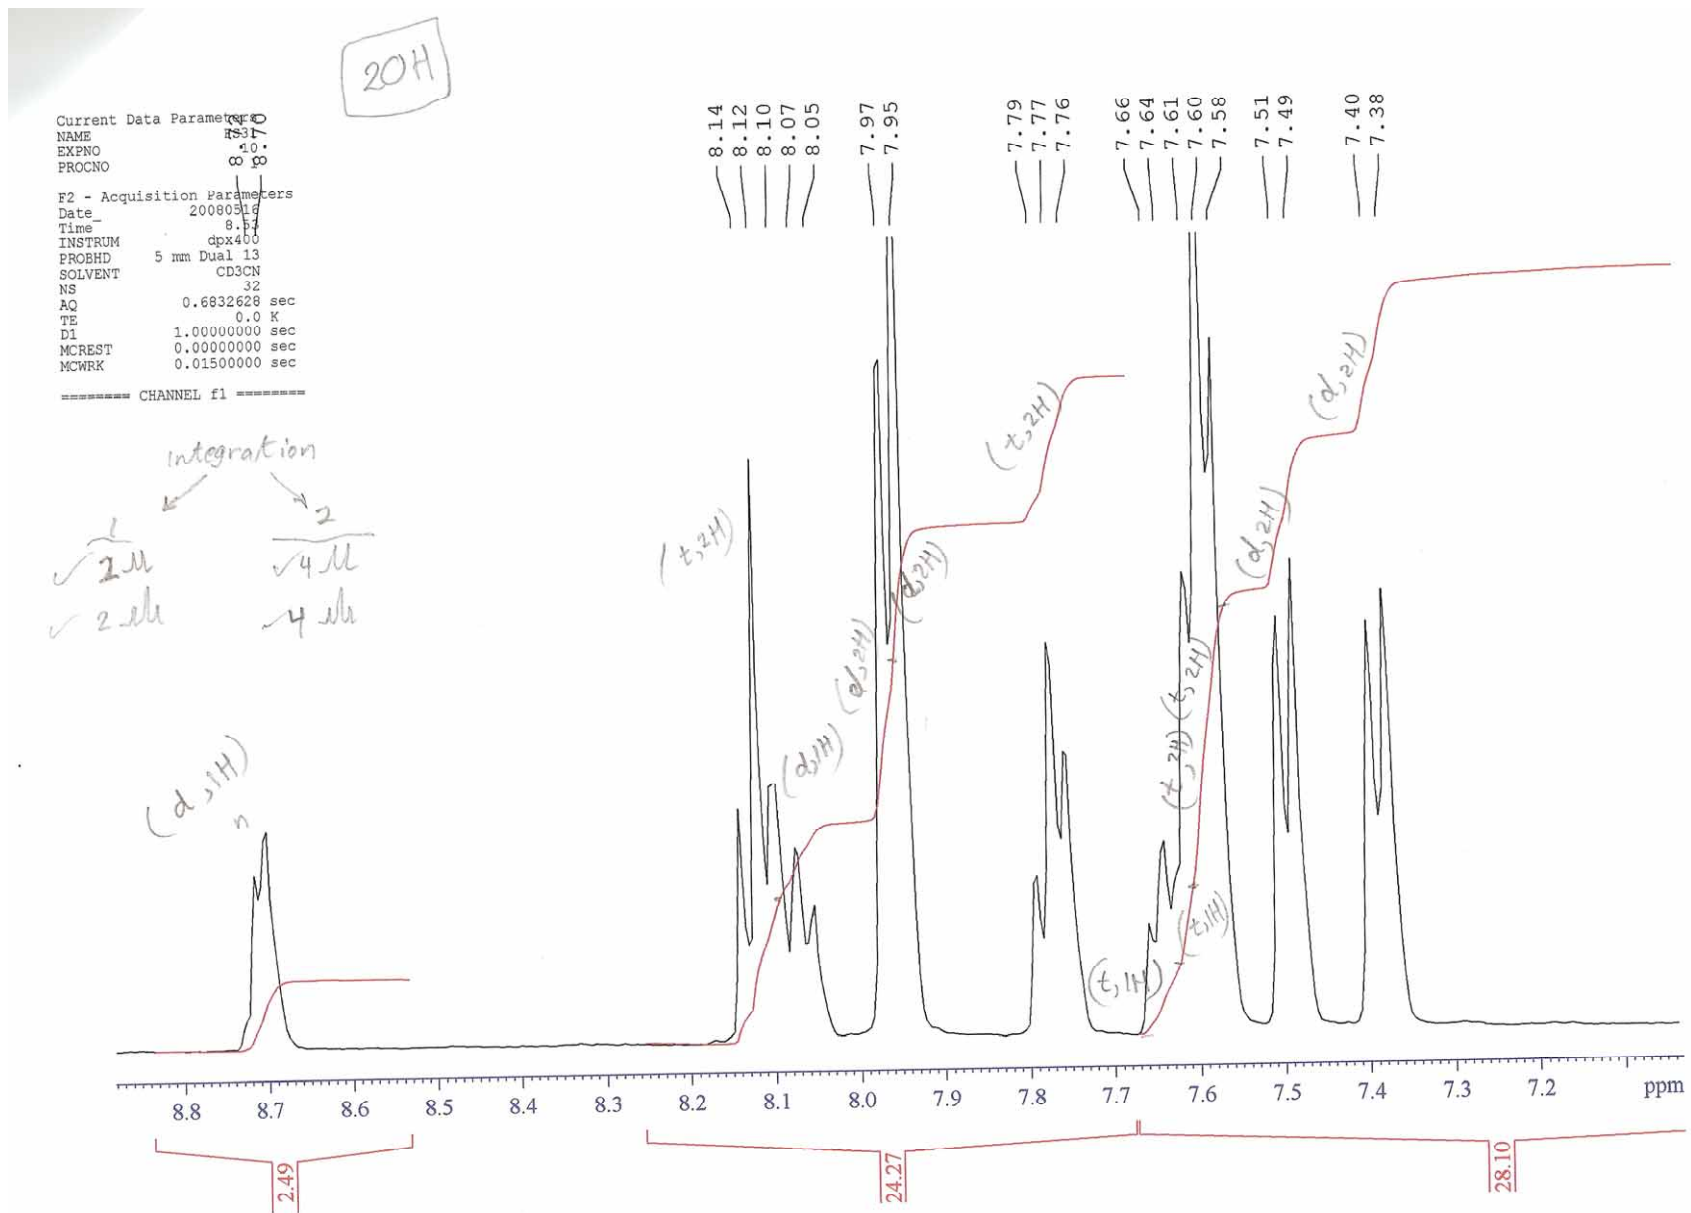

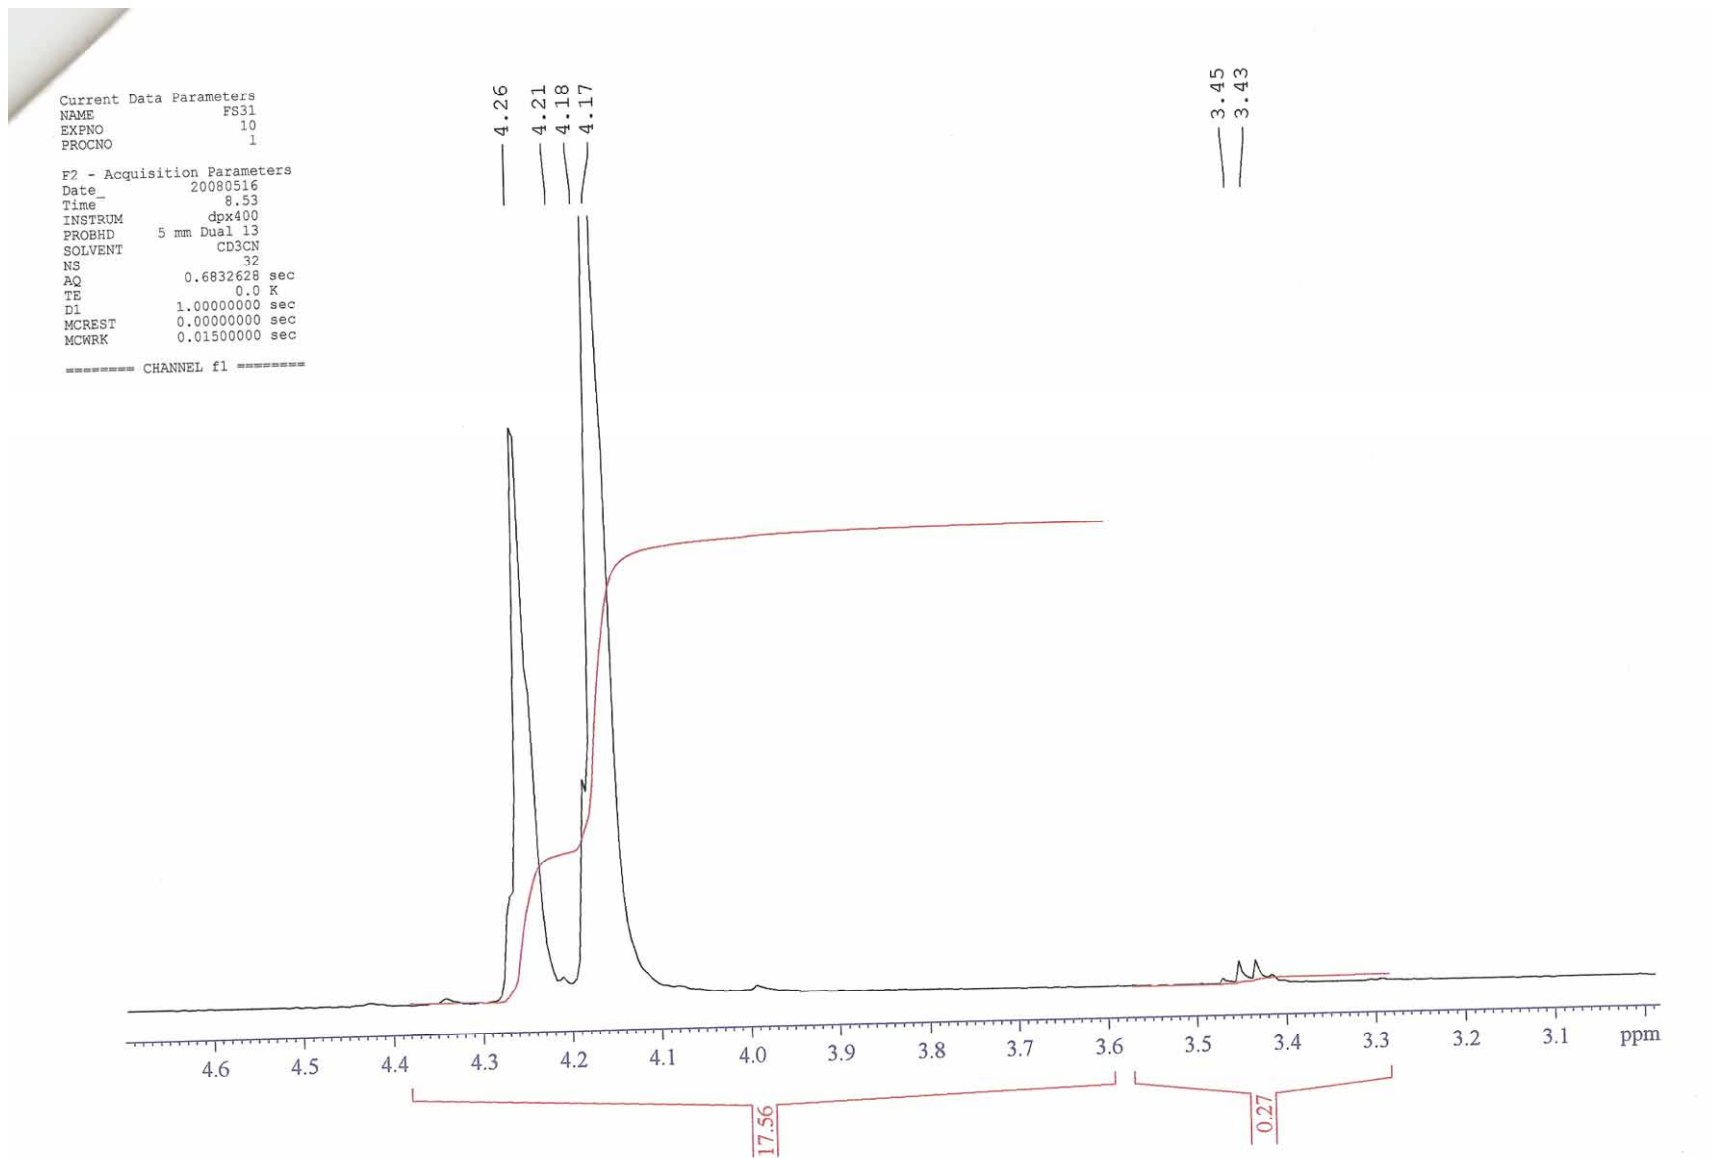

### Overlaid $^{13}\text{C}$ NMR of the Zn and Cd Species:

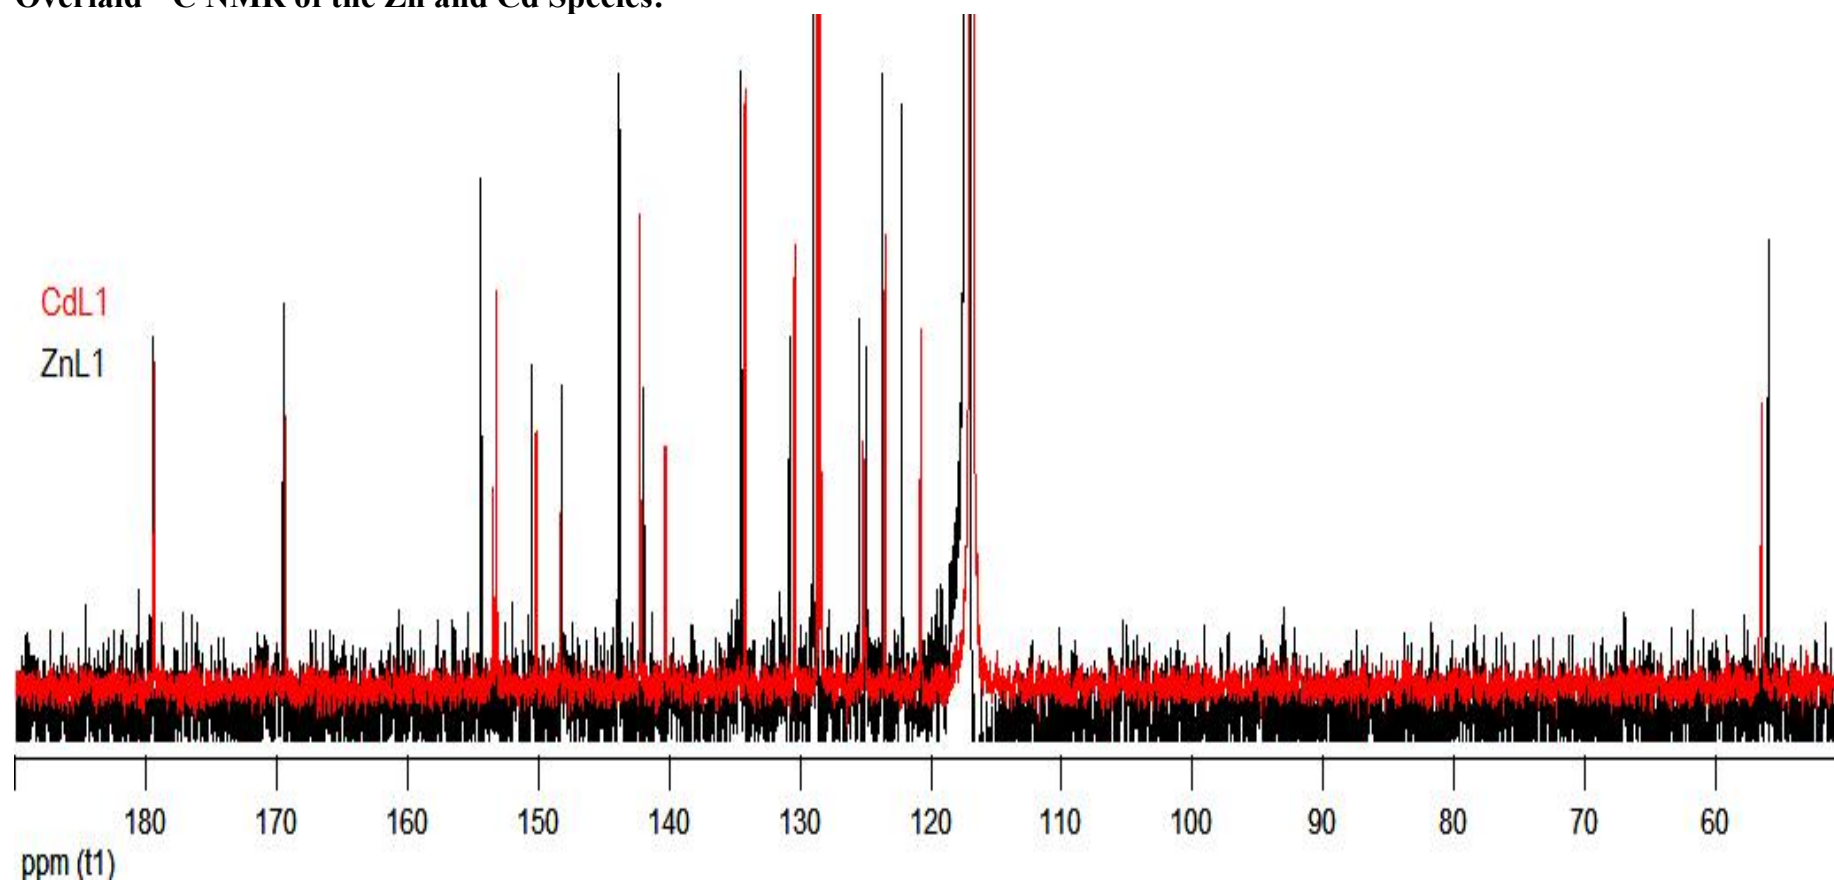

Supplement: c2dt11732k.pdf [file c2dt11732k.pdf]
